# Supplementary material for: Impact of body weight gain on hepatic metabolism and hepatic inflammatory cytokines in comparison of Shetland pony geldings and Warmblood horse geldings
Source: PeerJ. 2019 Jun 7;7:e7069. doi: 10.7717/peerj.7069 (PMC6557249; doi:10.7717/peerj.7069)
Supplement: Supplemental Information 5 [file peerj-07-7069-s005.xlsx]

## Sheet: BW, BCS,CNS
	Body weight (kg)						Body Condition Score						Cresty Neck Score
ID	breed	t0	t2	t5		ID	breed	t0	t2	t5		ID	breed	t0	t2	t5
1	Pony	186	220	226		1	Pony	3.15	4.1	4.75		1	Pony	2.5	3	3.75
3	Pony	96	134	142		3	Pony	1.15	3.6	4.15		3	Pony	0.75	2.5	4
5	Pony	98.5	121	132		5	Pony	2.8	3.6	3.9		5	Pony	2.5	2.5	3.5
7	Pony	145	183	178		7	Pony	2.5	3.75	4.1		7	Pony	2.5	4	4.5
11	Pony	108	121	130		11	Pony	3.4	3.4	3.65		11	Pony	3	2.75	3.25
13	Pony	95	134	158		13	Pony	0.65	3.2	3.75		13	Pony	0.5	2.5	3.25
15	Pony	120	126	132		15	Pony	4	3.7	4.15		15	Pony	3	2.75	3.5
17	Pony	119	146	137		17	Pony	1.2	3.7	3.75		17	Pony	1	3.5	4
19	Pony	95	134	144		19	Pony	0.75	3.25	3.7		19	Pony	0.25	2.25	3
21	Pony	121	131	132		21	Pony	3.65	3.5	3.5		21	Pony	3	3	3.5
4	Horse	530	644	640		4	Horse	1.15	3.25	3.35		4	Horse	0.75	2	2.75
6	Horse	596	754	780		6	Horse	2.5	3.8	4.8		6	Horse	2	3	4.5
8	Horse	650	710	702		8	Horse	2.65	3.5	3.75		8	Horse	1.75	2.75	3.5
10	Horse	600	688	678		10	Horse	2.05	3.5	3.65		10	Horse	2	3.25	4
12	Horse	585	690	696		12	Horse	3.35	3.6	3.85		12	Horse	2	2.75	3
14	Horse	650	766	752		14	Horse	2.9	3.85	3.8		14	Horse	2.25	3.25	3.75
16	Horse	665	730	732		16	Horse	3.3	3.6	3.75		16	Horse	2.75	2.75	3.5
20	Horse	570	666	680		20	Horse	1.6	3.1	3.5		20	Horse	1.5	2.75	3.5
22	Horse	570	654	662		22	Horse	3.2	3.6	4.1		22	Horse	2.5	3	4

## Sheet: Glucose, Insulin, NEFA, TG
	Plasma glucose (mmol/L)						Serum insulin (µU/mL)						Serum non-esterified fatty acids (µmol/L)						Serum triglycerides (mmol/L)
ID	breed	t0	t2	t5		ID	breed	t0	t2	t5		ID	breed	t0	t2	t5		ID	breed	t0	t2	t5
1	Pony	3.49421	3.83444	4.09879		1	Pony	5.246	6.462	9.994		1	Pony	60	334	277		1	Pony	0.34	0.28	0.3
3	Pony	3.37277	3.14929	4.17281		3	Pony	6.155	5.9	12.195		3	Pony	111	27	348		3	Pony	0.47	0.24	0.26
5	Pony	3.10295	4.05471	5.4515		5	Pony	5.843	8.193	16.146		5	Pony	58	210	166		5	Pony	0.71	0.26	0.51
7	Pony	3.42949	3.87367	6.26427		7	Pony	3.617	7.426	55.161		7	Pony	77	117	332		7	Pony	0.67	0.43	0.79
11	Pony	4.00767	3.73369	3.3658		11	Pony	3.698	5.565	10.556		11	Pony	422	40	107		11	Pony	0.32	0.32	0.2
13	Pony	3.67408	4.41254	4.0457		13	Pony	2.801	5.495	10.568		13	Pony	15	376	567		13	Pony	0.39	0.14	0.19
15	Pony	4.99753	4.57227	3.73299		15	Pony	4.68	24.016	5.474		15	Pony	137	60	488		15	Pony	0.55	0.61	0.38
17	Pony	2.5679	3.91465	4.15799		17	Pony	2.957	5.087	6.508		17	Pony	48	257	425		17	Pony	0.27	0.24	0.68
19	Pony	3.27546	3.91465	4.31715		19	Pony	2.344	4.889	6.855		19	Pony	81	120	444		19	Pony	0.33	0.36	0.39
21	Pony	3.37352	3.85622	3.85957		21	Pony	5.3	6.234	5.108		21	Pony	183	539	364		21	Pony	0.82	1.21	0.49
4	Horse	3.93169	4.34996	4.24114		4	Horse	5.664	16.416	25.198		4	Horse	366	109	387		4	Horse	0.17	0.14	0.35
6	Horse	3.81605	4.60917	4.93609		6	Horse	5.965	10.371	37.853		6	Horse	110	152	201		6	Horse	0.26	0.21	0.45
8	Horse	4.18801	4.71204	4.60584		8	Horse	5.904	7.947	9.631		8	Horse	488	243	198		8	Horse	0.48	0.26	0.38
10	Horse	4.1279	4.83184	3.95629		10	Horse	4.923	6.7	8.444		10	Horse	45	64	192		10	Horse	0.21	0.24	0.34
12	Horse	4.30618	4.49997	4.33887		12	Horse	5.138	9.747	12.307		12	Horse	1260	327	148		12	Horse	0.29	0.22	0.27
14	Horse	3.8321	4.25281	3.85026		14	Horse	4.732	6.822	8.935		14	Horse	342	262	363		14	Horse	0.24	0.28	0.24
16	Horse	4.10865	4.45997	4.06524		16	Horse	12.425	11.316	17.32		16	Horse	29	260	170		16	Horse	0.28	0.3	0.26
20	Horse	4.00115	4.20679	4.25747		20	Horse	5.658	8.063	7.503		20	Horse	282	295	257		20	Horse	0.24	0.22	0.28
22	Horse	4.41304	4.79106	5.31189		22	Horse	6.492	6.35	8.273		22	Horse	113	185	309		22	Horse	0.24	0.28	0.18

## Sheet: SAA
	Serum Amyloid A (µg/mL)
ID	breed	t0	t2	t5
1	Pony	0.4	0.1	0.1
3	Pony	0.1	0.1	0.1
5	Pony	0.1	0.1	0.1
7	Pony	0.1	0.6	0.1
11	Pony	0.9	0.1	0.1
13	Pony	0.1	0.1	339.7
15	Pony	0.1	0.1	0.1
17	Pony	0.1	0.6	0.1
19	Pony	1.5	0.4	0.1
21	Pony	0.1	187.2	0.1
4	Horse	0.1	0.1	0.1
6	Horse	0.1	0.1	0.1
8	Horse	0.1	0.1	0.1
10	Horse	0.1	0.1	3.2
12	Horse	0.1	0.1	0.1
14	Horse	0.1	0.1	0.1
16	Horse	0.1	0.1	0.1
20	Horse	0.1	0.5	0.1
22	Horse	0.1	0.1	0.1

## Sheet: hepatic mRNA levels
	CD68						IL-1β						IL-6						NFkB						TNFα						Chemerin						FABP1						LPL
ID	breed	t0	t2	t5		ID	breed	t0	t2	t5		ID	breed	t0	t2	t5		ID	breed	t0	t2	t5		ID	breed	t0	t2	t5		ID	breed	t0	t2	t5		ID	breed	t0	t2	t5		ID	breed	t0	t2	t5
1	Pony	0.517293	0.449253	0.402683		1	Pony	0.734734	0.84557	2.03656		1	Pony	0.201579	0.261973	1.99467		1	Pony	0.808148	0.516544	0.958038		1	Pony	0.404324	0.370895	2.09502		1	Pony	0.471539	0.629202	1.33436		1	Pony	0.955108	0.182972	0.196588		1	Pony	0.401658	0.354566	0.483206
3	Pony	1.03601	0.571835	0.507914		3	Pony	1.54961	0.35188	0.394747		3	Pony	1.50634	0.201175	0.45304		3	Pony	1.2128	0.565204	0.528821		3	Pony	1.38922	0.232729	0.696248		3	Pony	0.551467	0.720257	1.30607		3	Pony	0.690531	0.405258	0.37189		3	Pony	1.04291	0.258685	0.607297
5	Pony	0.789944	0.419561	0.710946		5	Pony	1.40654	1.03114	1.19558		5	Pony	0.89039	0.633697	0.7995		5	Pony	1.86233	0.591752	0.651313		5	Pony	0.721108	0.596239	1.21974		5	Pony	0.617684	0.755865	1.22371		5	Pony	0.620776	0.522564	0.339997		5	Pony	0.536364	0.300773	3.80267
7	Pony	0.697262	1.34807	0.617179		7	Pony	0.864215	0.37455	0.702908		7	Pony	0.252872	0.270579	0.378648		7	Pony	0.728816	0.7648	0.466591		7	Pony	0.824619	0.733726	0.407951		7	Pony	0.671527	0.797943	1.18825		7	Pony	0.529987	0.67454	0.850404		7	Pony	0.300481	0.405381	0.42854
11	Pony	1.91923	1.24804	0.687565		11	Pony	0.420483	1.35616	1.03843		11	Pony	0.292407	0.852329	0.0890626		11	Pony	0.880256	0.935787	0.581521		11	Pony	0.485219	1.12863	0.470347		11	Pony	0.83389	0.68822	0.825313		11	Pony	0.734053	0.391785	0.742113		11	Pony	1.6355	1.04626	0.544604
13	Pony	0.636537	0.833051	0.795825		13	Pony	0.785241	0.416943	0.738321		13	Pony	0.528985	0.348882	0.771331		13	Pony	1.00248	0.704329	0.630284		13	Pony	0.516781	0.814366	1.10611		13	Pony	0.761253	0.756036	0.993147		13	Pony	0.758338	0.351732	0.614571		13	Pony	1.57165	0.890718	1.44861
15	Pony	0.562458	0.69985	0.769873		15	Pony	5.05122	0.940724	0.569171		15	Pony	4.81475	0.303199	0.821051		15	Pony	0.818134	0.76225	0.55273		15	Pony	4.13437	0.655897	1.20934		15	Pony	0.489654	0.712271	1.45464		15	Pony	0.48827	0.623256	0.779307		15	Pony	0.280396	0.205645	1.47971
17	Pony	0.680495	0.858763	0.861164		17	Pony	0.45801	0.956174	0.662984		17	Pony	0.284438	0.247275	0.62333		17	Pony	0.666364	0.719145	0.910308		17	Pony	0.444934	0.400358	0.658675		17	Pony	0.548263	0.745388	1.35955		17	Pony	0.730653	0.622453	1.71325		17	Pony	1.56693	1.25768	2.06524
19	Pony	0.750927	0.183103	0.562096		19	Pony	0.405822	0.475188	0.653687		19	Pony	0.160164	0.198107	0.616128		19	Pony	0.778272	0.883868	0.623409		19	Pony	0.365381	0.72648	0.753745		19	Pony	0.655387	0.569688	0.86924		19	Pony	0.725703	0.385615	0.746068		19	Pony	0.31616	0.845277	0.452221
21	Pony	0.838983	1.37301	0.493728		21	Pony	0.775626	0.534487	0.623831		21	Pony	0.254045	0.232417	0.269092		21	Pony	0.759332	0.662987	0.586904		21	Pony	0.757608	1.03445	0.702364		21	Pony	0.855585	0.442263	0.516913		21	Pony	0.460318	0.339832	0.56152		21	Pony	0.463675	2.50085	1.07501
4	Horse	0.49596	0.521597	0.51911		4	Horse	0.523784	0.517756	0.765803		4	Horse	0.288334	0.323228	0.558867		4	Horse	0.555359	0.665336	0.538129		4	Horse	0.47116	0.474472	0.642611		4	Horse	0.54892	0.675972	1.26589		4	Horse	0.749978	0.507415	0.701456		4	Horse	0.49627	0.356083	0.764117
6	Horse	2.039	0.534797	0.601351		6	Horse	0.492738	0.43988	0.984721		6	Horse	0.242126	0.152089	0.459313		6	Horse	1.17451	0.61424	0.490855		6	Horse	0.455856	0.309345	0.937714		6	Horse	0.614725	0.778183	1.23146		6	Horse	0.685422	0.662901	0.71381		6	Horse	0.454218	0.432447	0.44405
8	Horse	0.41471	0.36069	0.404007		8	Horse	0.632472	0.513786	0.563585		8	Horse	0.301117	0.229368	0.441803		8	Horse	0.494695	0.698559	0.4156		8	Horse	0.388559	0.21196	0.490504		8	Horse	0.662862	0.73282	1.2659		8	Horse	0.731891	0.667928	1.01259		8	Horse	0.203741	0.115883	0.132299
10	Horse	0.564271	0.856068	1.18473		10	Horse	0.491892	0.321604	0.581589		10	Horse	0.187803	0.396438	0.530824		10	Horse	0.616128	0.994653	0.994102		10	Horse	0.366361	0.765423	0.724795		10	Horse	0.577243	0.524652	1.10554		10	Horse	0.825191	0.518145	1.21436		10	Horse	0.242464	0.608536	0.595914
12	Horse	0.367582	0.435674	0.381704		12	Horse	0.638143	0.787444	0.546467		12	Horse	0.26505	0.820123	0.2634		12	Horse	1.07477	0.854223	0.467522		12	Horse	0.44713	0.906196	0.774898		12	Horse	0.455366	0.508735	0.908894		12	Horse	0.380572	0.423784	0.499958		12	Horse	0.395561	0.235635	0.243106
14	Horse	0.456911	0.594885	0.489032		14	Horse	1.46322	0.538829	0.340909		14	Horse	1.21306	0.315759	0.14437		14	Horse	0.866499	0.739794	0.392132		14	Horse	1.18609	0.750145	0.380805		14	Horse	0.553337	0.697799	1.1172		14	Horse	0.415097	0.283553	0.444605		14	Horse	0.218447	0.594355	0.34757
16	Horse	0.419523	0.53872	0.518		16	Horse	0.398089	0.477856	0.401544		16	Horse	0.0959896	0.219424	0.26158		16	Horse	0.655958	0.756397	0.447252		16	Horse	0.307137	0.379946	0.322846		16	Horse	0.593468	0.71033	1.26107		16	Horse	0.407484	0.489373	0.193747		16	Horse	0.410682	0.181629	0.343539
20	Horse	1.0088	0.523295	0.460595		20	Horse	0.226849	0.366335	0.437327		20	Horse	0.334947	0.134358	0.323296		20	Horse	0.751292	0.592931	0.401806		20	Horse	0.341712	0.317292	0.592062		20	Horse	0.741144	0.5845	1.19691		20	Horse	0.995197	0.560068	0.929276		20	Horse	1.05342	0.177266	0.298978
22	Horse	0.582912	0.448036	0.201046		22	Horse	0.78758	0.69821	0.157361		22	Horse	0.441906	0.409123	0.882413		22	Horse	0.494477	0.459594	0.458598		22	Horse	0.527686	0.575049	1.50384		22	Horse	0.666238	0.537206	0.788646		22	Horse	1.02825	0.676806	0.938838		22	Horse	0.525501	0.212845	0.215173

## Sheet: liver enzymes, steatosis stage
	ALP (U/L)									AST (U/L)									GGT (U/L)									GLDH (U/L)									BA (µmol/L)									steatosis stage
ID	breed	t0	t1	t2	t3	t4	t5		ID	breed	t0	t1	t2	t3	t4	t5		ID	breed	t0	t1	t2	t3	t4	t5		ID	breed	t0	t1	t2	t3	t4	t5		ID	breed	t0	t1	t2	t3	t4	t5		ID	breed	t0	t5
1	Pony	102	99	82	80	110	80		1	Pony	444.5	439.4	429.7	293.9	304.3	267.2		1	Pony	64.4	28.9	22.7	18.5	25.6	25.7		1	Pony	7.5	12.2	10.3	8.4	11	7.7		1	Pony	5.2	8.9	6.1	14.7	15	10.1		1	Pony	0	0
3	Pony	148	135	112	124	164	112		3	Pony	340.3	389	381.3	361.7	269.1	255.2		3	Pony	28.5	25.6	14.4	14.4	16.2	15.9		3	Pony	4.1	8.8	10.4	4.5	5.1	4		3	Pony	6	10.1	6.2	6.9	5.4	7.7		3	Pony	1	1
5	Pony	238	170	143	173	196	171		5	Pony	512.4	488.7	433.5	442.1	455.7	314.1		5	Pony	213.1	45.5	14.9	17	29.1	20.3		5	Pony	3	18	4	6	9.6	4.1		5	Pony	2.7	9.7	6	4.9	6.7	5.6		5	Pony	0	2
7	Pony	225	123	105	138	161	139		7	Pony	269.9	379.7	366.3	387.3	355.6	342.5		7	Pony	57	28.6	28.1	43.8	91.9	73.1		7	Pony	3	7.7	27	27.9	12.6	6.4		7	Pony	3.7	9.2	4.1	11	4	5.6		7	Pony	0	1
11	Pony	340	165	96	113	125	79		11	Pony	337.2	580.7	505	531.9	586.5	446.1		11	Pony	122.3	25.4	29.7	28.6	50.4	29.8		11	Pony	20.3	47.5	23.9	60.7	139.6	31.6		11	Pony	6	8.9	5.1	8.9	9.4	8.7		11	Pony	1	0
13	Pony	179	171	151	149	131	124		13	Pony	332.4	517.7	359.7	410.7	523.7	423.3		13	Pony	63	22.4	13.8	16.9	33.3	21.1		13	Pony	2.6	54.2	27.2	24.5	21.4	21.2		13	Pony	7.2	18.5	23.3	23.8	22.4	18.6		13	Pony	0	0
15	Pony	154	151	124	116	146	101		15	Pony	283.3	446.1	326	392.3	378.6	335.6		15	Pony	36	24.2	12.3	13.6	19.6	15.1		15	Pony	2.4	7.6	1.8	12.1	4.4	4.4		15	Pony	1.7	5.6	2.9	12	8	8.3		15	Pony	0	0
17	Pony	134	131	122	113	151	836		17	Pony	372.8	496.9	466	405.5	396.5	436.6		17	Pony	68	52.4	26.4	17.9	22.5	155.1		17	Pony	7.3	26.1	62.1	5.8	14.8	37.8		17	Pony	5.6	13.5	17.3	10.4	13	33.7		17	Pony	0	3
19	Pony	230	164	123	138	158	135		19	Pony	255.2	569.5	420.7	459.8	435.1	427.5		19	Pony	45.3	30.5	14.3	17.4	19.4	23.9		19	Pony	7.8	33.9	10.2	27.1	27.8	24.1		19	Pony	6.5	13.4	2.8	16.1	21.1	14.9		19	Pony	0	0
21	Pony	293	237	200	377	591	199		21	Pony	410.6	447.5	388.7	697.9	628.8	477.6		21	Pony	264.6	19.5	18.4	198.9	363.3	170.4		21	Pony	12.4	21.5	11	255	310.9	76.4		21	Pony	5.8	11.5	13.3	17.4	25.3	10.9		21	Pony	0	0
4	Horse	130	96	92	93	108	81		4	Horse	278	322.1	305.6	308.8	325.2	247.3		4	Horse	10.3	17.8	17.1	17.3	20.7	15.5		4	Horse	2	3.5	3.4	2.4	5.9	1		4	Horse	3.2	6	12.4	5.4	9.4	3.8		4	Horse	0	0
6	Horse	167	141	110	129	154	128		6	Horse	605.1	403.8	316.9	355.2	294.6	445.3		6	Horse	102.5	33.9	19.3	18.4	19.2	52.9		6	Horse	35.8	5.3	2.1	1.7	3.9	13.4		6	Horse	8.1	6.4	4.6	2.4	5	5		6	Horse	0	0
8	Horse	127	98	83	94	107	89		8	Horse	398.8	320.8	284.1	257.4	286.6	269.2		8	Horse	39.1	16.4	10.8	12.5	13.9	14.8		8	Horse	11.6	4.5	2.2	2.1	5	3		8	Horse	2	5.9	8.8	7	8.4	5		8	Horse	0	0
10	Horse	135	156	114	127	136	103		10	Horse	376.3	416.1	335.8	359.1	299.2	277.9		10	Horse	26.1	16.4	11.6	12.5	11.2	11.7		10	Horse	2.9	2.4	2	1.6	1.7			10	Horse	2.1	2.4	2.3	2.5	3.5	2.7		10	Horse	0	1
12	Horse	170	155	184	143	146	141		12	Horse	307	359.4	337.3	320.4	302.7	274.1		12	Horse	24.6	22.2	44.2	13.7	15.3	13.8		12	Horse	2.2	4.1	4.3	3.2	3.9	7.3		12	Horse	3	5.4	9.4	4.1	4.8	6.8		12	Horse	0	0
14	Horse	184	96	87	113	123	112		14	Horse	305.1	351.5	311.6	270.1	261.6	291.1		14	Horse	31.9	34.4	26.3	33.8	32.5	53.6		14	Horse	1.9	5.2	7.6	4	2.5	8.7		14	Horse	3.2	4.8	6.3	4.5	4.3	4.4		14	Horse	1	0
16	Horse	109	116	117	120	116	99		16	Horse	306.8	316.6	283.5	310.2	291.6	300.2		16	Horse	16.8	20.6	12.9	12.1	12	14.9		16	Horse	1.9	3.5	2.2	2.3	2.9	2.7		16	Horse	2.9	7.2	5.7	9.4	5.5	5.9		16	Horse	0	0
20	Horse	156	146	141	128	141	149		20	Horse	349.2	395.6	434.6	315.9	503.3	769.6		20	Horse	127.8	26.3	15.1	13.2	32.5	57.7		20	Horse	2	2.8	21.9	2.8	12.7	125.8		20	Horse	6.1	3.3	10.4	3.9	7.8	11.5		20	Horse	1	0
22	Horse	88	77	65	76	90	70		22	Horse	322.3	338.9	307.5	321.9	312.8	286		22	Horse	6.6	12.8	9.6	9.6	17.6	12.7		22	Horse	1.5	2.9	1.9	2.6	2.8	1.3		22	Horse	8.3	7.3	7.3	7.7	6	13		22	Horse	1	0
